# Supplementary material for: The Barriers to Rapid Reperfusion in Acute ST-Elevation Myocardial Infarction
Source: Springer Nature journal article supplement (doi:10.1007/s40119-022-00281-7), 2022-10-06
Supplement: MOESM1 [file 23577552]

## **The barriers to rapid reperfusion in acute ST-elevation myocardial infarction**

Kristian Bartnes<sup>1,2</sup>, Hilde Albrigtsen<sup>3</sup>, Johanne M. Iversen<sup>4</sup>, Henrik Brovold<sup>5</sup>, Niels H. Møller<sup>6</sup>, Bjørn Wembstad<sup>7</sup>, Frode Arstad<sup>8</sup>, Andreas H. Kristensen<sup>3</sup>, Julia Cortis<sup>9</sup>, Siv J. Olsen<sup>10</sup>, Ståle N. S. Nygaard<sup>11</sup>, Sven G. Kindler<sup>12</sup>, Oddgeir Moe<sup>1</sup>, Christian Hansen<sup>13</sup>, Jan T. Mannsverk<sup>3</sup>

<sup>1</sup>Division of Cardiothoracic and Respiratory Medicine, University Hospital of North Norway, P.O. Box 100, N-9038 Tromsø, Norway

<sup>2</sup>Institute of Clinical Medicine, University of Tromsø The Arctic University of Norway, N-9037 Tromsø, Norway

<sup>3</sup>Department of Cardiology, University Hospital of North Norway, P.O. Box 100, N-9038 Tromsø, Norway

<sup>4</sup>Department of Medicine, Nordlandssykehuset Bodø, N-8092 Bodø

<sup>5</sup>Department of Medicine Narvik, University Hospital of North Norway, P.O. Box 273, 8504 Narvik, Norway

<sup>6</sup>Clinic of Medicine, Helgelandssykehuset, P.O. Box 601, N-8607 Mo i Rana, Norway

<sup>7</sup>Department of Medicine, Clinic of Hammerfest, Finnmarkssykehuset, Sykehusveien 35, N-9601 Hammerfest, Norway

<sup>8</sup>Clinic of Medicine, Helgelandssykehuset, P.O. Box 613, N-8801 Sandnessjøen, Norway

<sup>9</sup>Department of Medicine, Nordlandssykehuset Vesterålen, Ivar Bergmos gt. 3, N-8450 Stokmarknes, Norway

<sup>10</sup>Division of Internal Medicine Harstad, University Hospital of North Norway, P.O. Box 1065, N-9480 Harstad, Norway

<sup>11</sup>Department of Medicine, Clinic of Kirkenes, Finnmarkssykehuset, P.O. Box 410, N-9915  
Kirkenes, Norway

<sup>12</sup>Department of Medicine, Nordlandssykehuset Lofoten, Sykehusbakken 23, N-8372  
Gravdal, Norway

<sup>13</sup> Clinic of Medicine, Helgelandssykehuset, P.O. Box 568, N-8801 8651 Mosjøen, Norway

Corresponding Author: Kristian Bartnes, Division of Cardiothoracic and Respiratory  
Medicine, University Hospital of North Norway, P.O. Box 100, N-9038 Tromsø, Norway.  
Telephone: +47 776 28358; e-mail: [kristian.bartnes@unn.no](mailto:kristian.bartnes@unn.no)

Figure 6

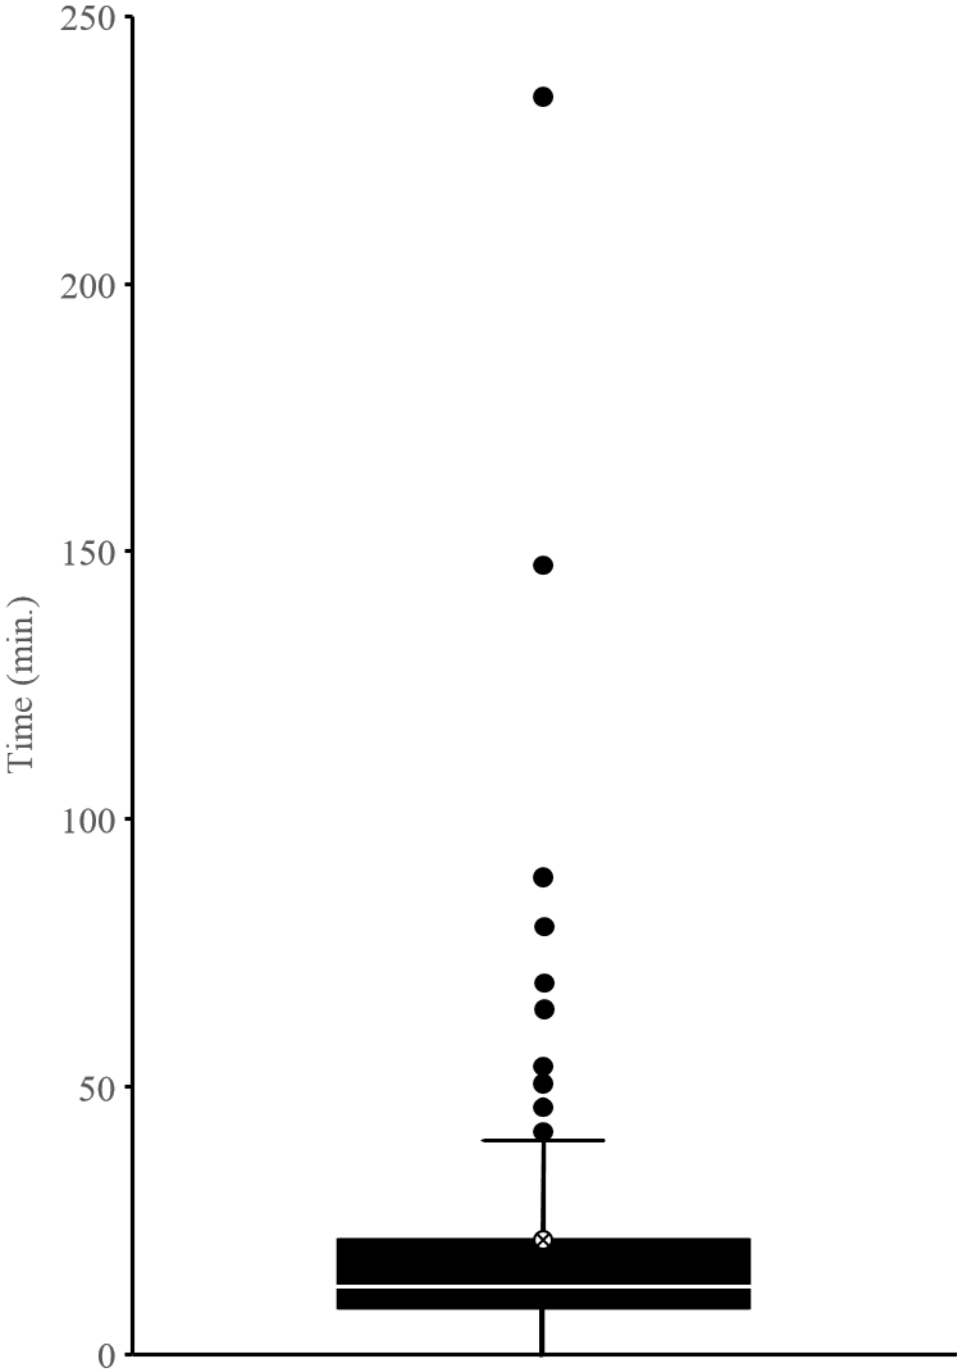

Figure 7

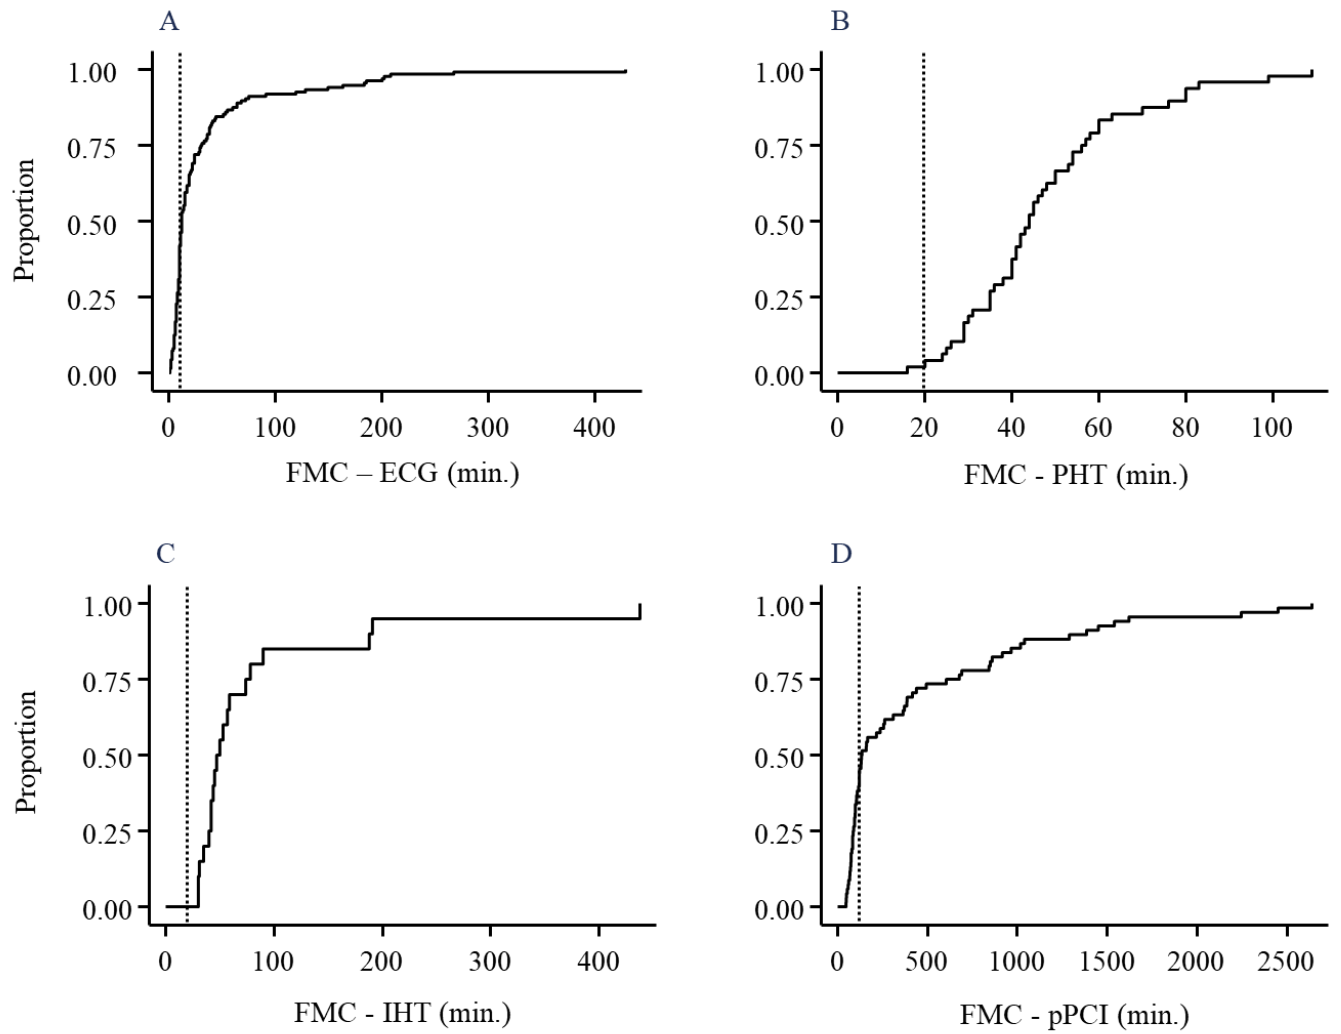

Fig. 6

The figure shows the time interval from the alarm call to the 1<sup>st</sup> medical contact of 133 patients with acute ST-elevation myocardial infarction [median (-): 13 min., 75 % percentile: 22 min., mean (X): 21 min., interquartile range: 13 min.]. ● indicates outliers with time intervals exceeding 1.5 x the 75 % percentile.

Fig. 7

Depicted is the accumulated proportion of patients who received reperfusion therapy in the acute phase of an ST-elevation myocardial infarction during November 1<sup>st</sup> 2020 - April 23<sup>rd</sup> 2021 and the time from 1<sup>st</sup> medical contact (FMC) to recording of the electrocardiogram (ECG) which guided decision-making (A) (n = 137), initiation of prehospital thrombolytic therapy (PHT) (B), initiation of in-hospital thrombolytic therapy (IHT) (C), and primary percutaneous coronary intervention (pPCI) (D). Dotted vertical lines indicate time limits recommended in guidelines [1].
